# Supplementary material
Source: HighWire-hosted journal article supplement (https://jitc.bmj.com/content/8/1/e000251)

**Supplementary Figure 1**

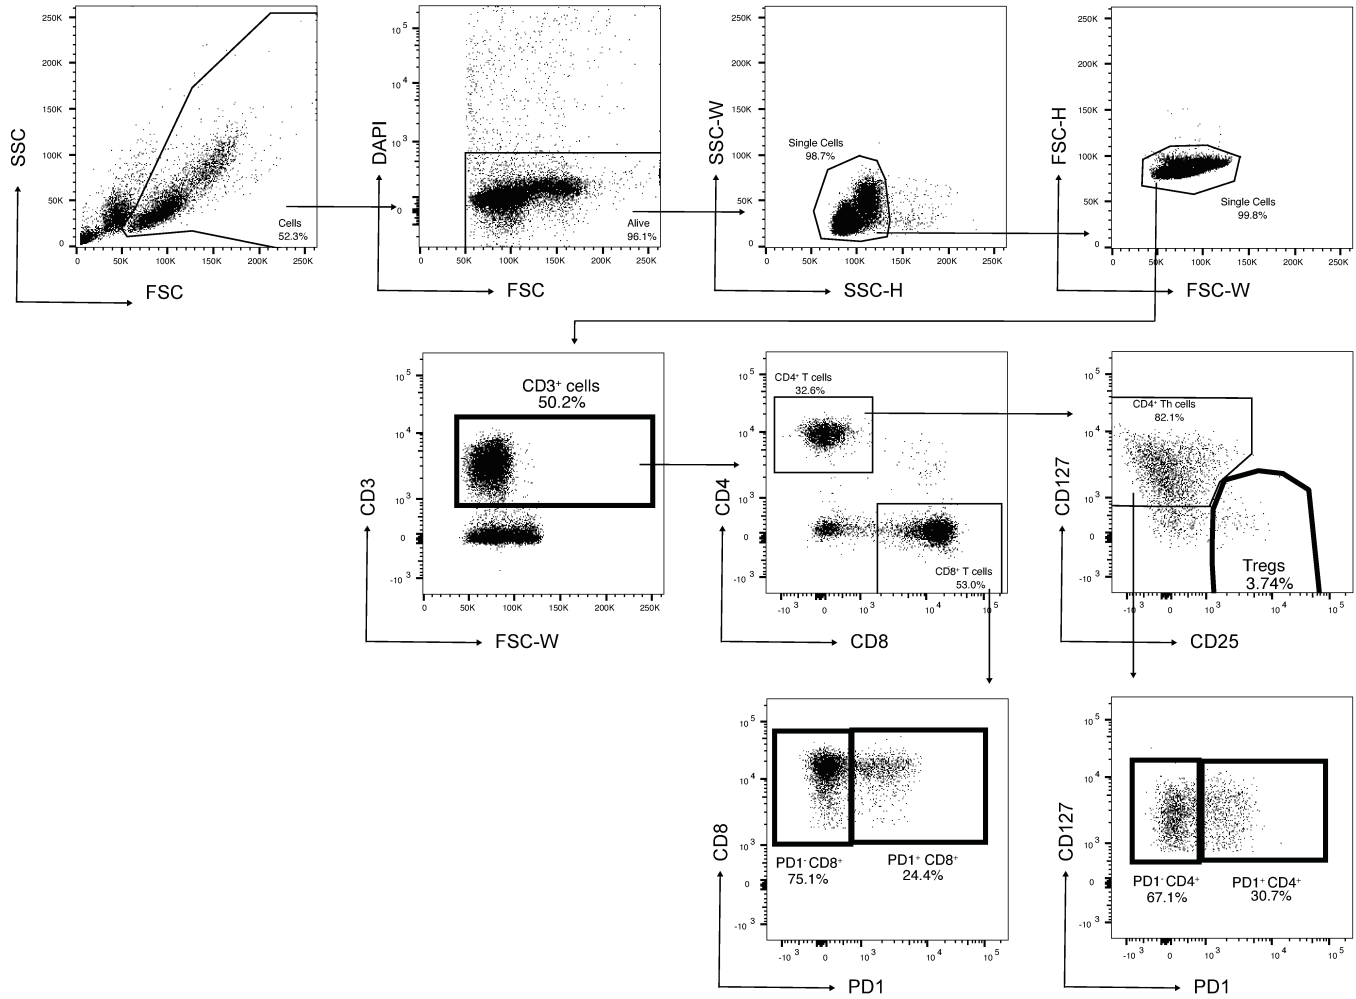

Supplement: inline-supplementary-material-3 [file inline-supplementary-material-3.pdf]

## Supplementary Figure 6

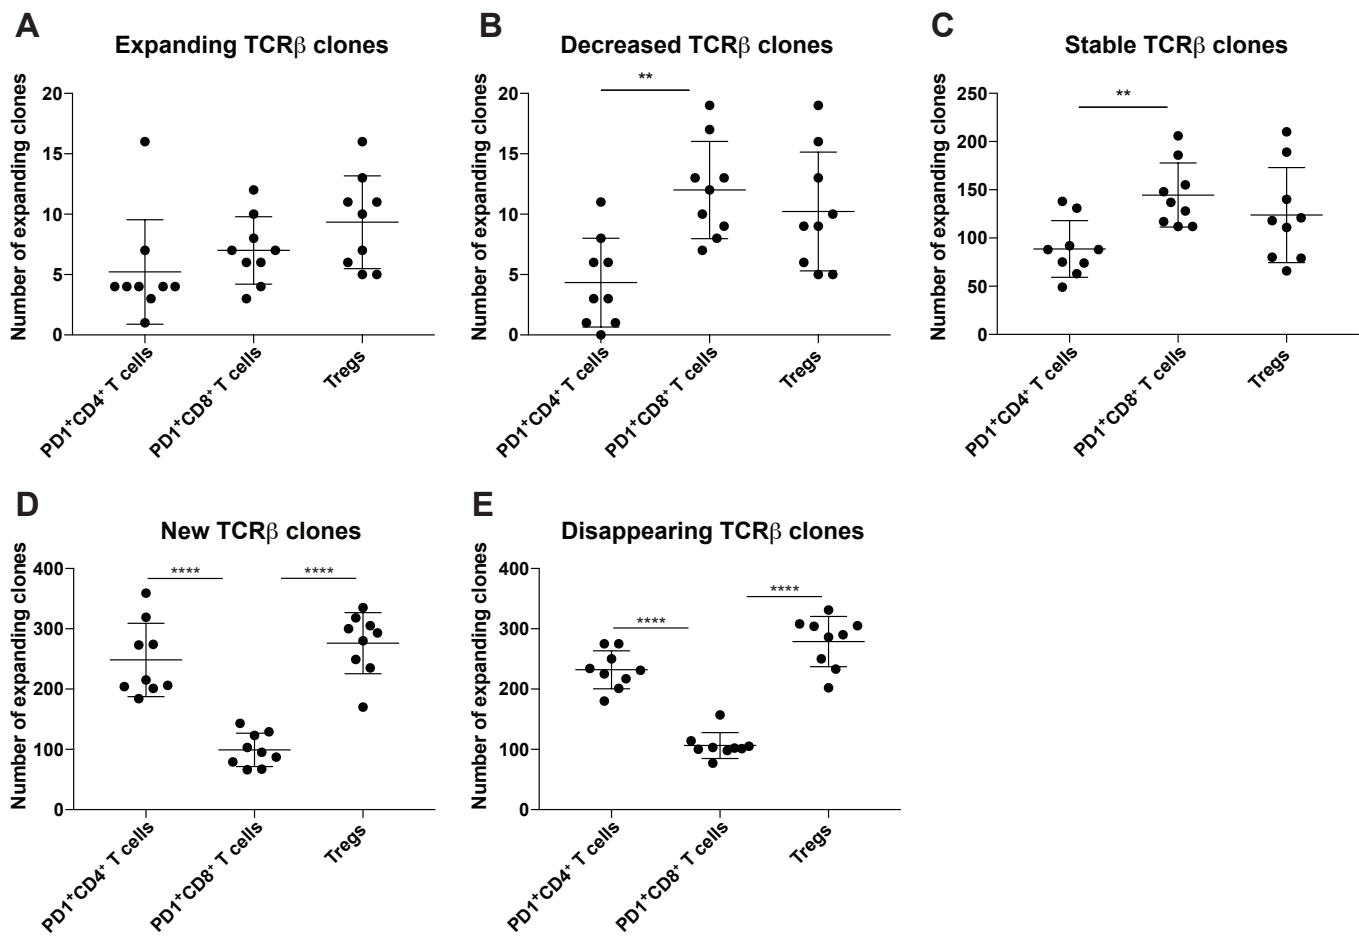

Supplement: inline-supplementary-material-9 [file inline-supplementary-material-9.pdf]
